# Supplementary material for: Comparative genomics reveals the origin of fungal hyphae and multicellularity
Source: PubMed Central journal article supplement (PMC6733946; doi:10.1038/s41467-019-12085-w), 2019-09-09
Supplement: 41467_2019_12085_MOESM1_ESM.pdf [file 41467_2019_12085_MOESM1_ESM.pdf]

## Supplementary Information

### Comparative genomics reveals the origin of fungal hyphae and multicellularity

Kiss et al.

#### Contents:

- Supplementary Note 1. Copy number analysis of *Fonticula alba* and its relationship to fungal multicellularity.*
- Supplementary Figure 1. Phylogenetic trees inferred using RAxML, IQ-tree and PhyloBayes.*
- Supplementary Figure 2. Reconstructed gene duplication/loss histories across all the gene families in the examined genomes*
- Supplementary Figure 3. Reconstructions of ancestral gene copy numbers of histidine-kinase genes.*
- Supplementary Figure 4. Conservation of hypha morphogenesis genes across fungi.*
- Supplementary Figure 5. Phylogenetic age distribution of hypha morphogenesis genes.*
- Supplementary Figure 6. Statistical comparisons of basic structural properties of genes related to hyphal MC.*
- Supplementary Figure 7. Comparison of the dynamics of PFAM domain evolution between plesiomorphically unicellular and multicellular fungi.*
- Supplementary Figure 8. Reconstructions of ancestral gene copy numbers of NADPH-oxidase genes.*
- Supplementary References.*

## Supplementary Note 1

A complete genome of *Fonticula alba*, a representative of the sister group of Fungi became available recently. *Fonticula* forms simple multicellular fruiting bodies which arise by the aggregation of individual cells (termed cellular slime mold habit<sup>1-5</sup>). As such, its multicellularity differs from hyphal multicellularity in fungi, but it is nevertheless interesting if any of the genes we examined in fungi also show expansions/contractions in *Fonticula*. The genome of *Fonticula alba* became available after the completion of our analyses, but considering its importance – its sister position to fungi and aggregative multicellular lifestyle – we complemented our analysis with its genome and performed copy number-based analyses using the same methods as for fungi.

First we investigated Ser/Thr and histidine kinases, G-protein coupled receptors (GPCRs) and adhesive proteins. We found that *Fonticula* has much fewer Ser/Thr kinases (323) than metazoans (mean 644) and it was more similar to gene copy numbers of non-fungal opisthokonts (mean 392) than to fungi (mean 260). Considerably fewer histidine kinases were found in *Fonticula* (10) than in multicellular fungi (mean 23)(Suppl. Fig. 3). We detected no GPCRs in *Fonticula* (Fig. 2b). The adhesion gene set (6), in turn, was similar to that of protists, early fungi and the Mucoromycotina, although it should be noted that all these groups have poor adhesion gene repertoires.

We also focused on the main hyphal multicellularity-related functional categories and analyzed their copy numbers in *Fonticula alba* compared to the other 71 species (Suppl. Data 2). In “cell wall biogenesis” and “transcriptional regulation” categories, where we found significant gene family expansions potentially related to hyphal multicellularity, *Fonticula* had low gene copy numbers, resembling protists and animals rather than fungal lineages. In terms of “polarity maintenance” genes, *Fonticula* was most similar to other non-fungal eukaryotes like *Monosiga* and *Capsaspora*, and to plesiomorphically unicellular fungi (*Rozella*, *Catenaria*, *Batrachomyces* species). On the other hand, in gene groups that were more diverse in non-fungal lineages (e.g. vesicle transport, actin cytoskeleton), *Fonticula* showed transitional copy numbers between non-fungal protists and fungi. For example in “vesicle transport” genes, *Fonticula* showed the same pattern as fungi compared to non-fungal species. In “actin cytoskeleton” genes we observed a reduction of gene repertoire in *Fonticula* (27) compared to fungi (mean 34), metazoa (mean 47) and protists (mean 45) Microtubule transport-related genes were generally more diverse in Metazoa (mean 101), protists (mean 51), early fungi (mean 70), Mucoromycota (mean 56) and Agaricomycotina (mean 77), than in *Fonticula* (25). The genetic toolkit for signaling was small in *Fonticula* (52) compared to animals (mean 148), protists (mean 85) and most of fungi (mean 77). Phagocytosis-related genes were conserved in *Fonticula alba*, including two families (WAVE and WASH) that were lost in fungi, indicating an overall similarity to non-fungal protists rather than fungi (Fig. 4.).

Taken together, these analyses reveal that in the examined multicellularity-related genes *Fonticula* resembles the non-fungal protists more than it does fungi, which accords well with the independent origin of a different type of multicellularity (aggregative) in *Fonticula*<sup>2</sup>.

RAXML-bootstrap  
72 species

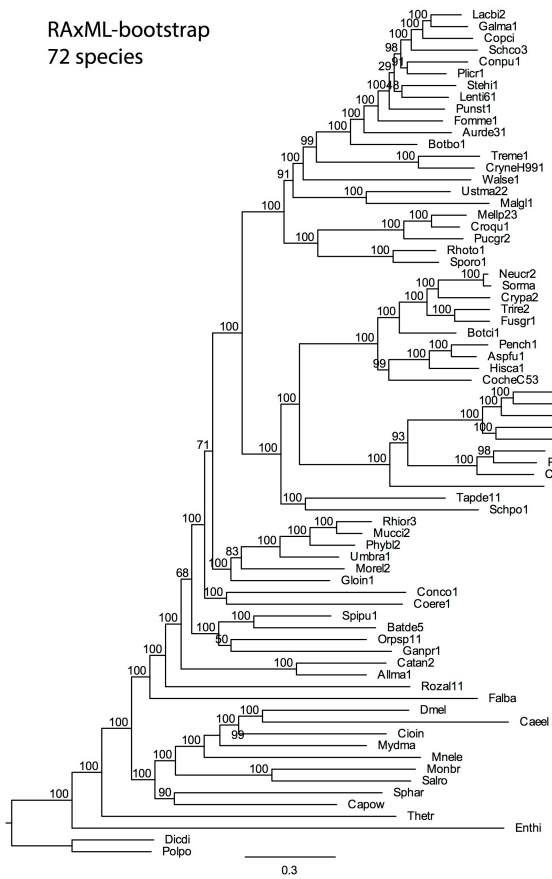

IQ-Tree-bootstrap  
72 species

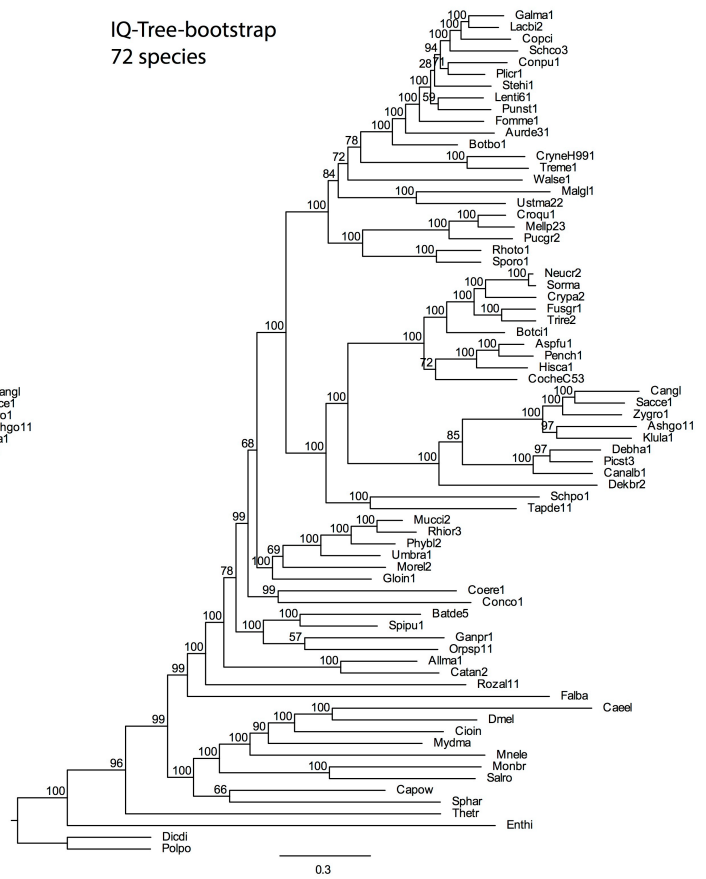

PhyloBayes  
72 species

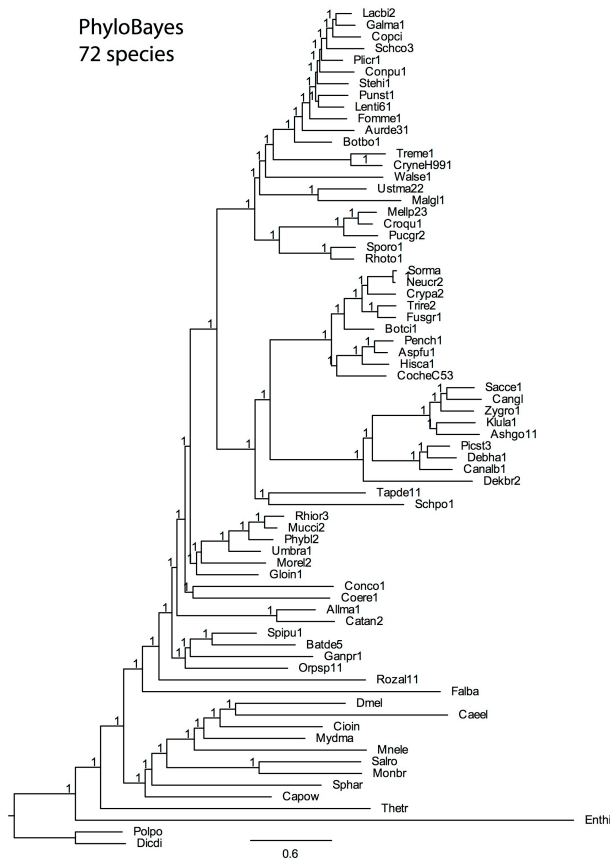

Supplementary Fig. 1. Phylogenetic trees inferred from 455 single-copy orthologs using three different methods.

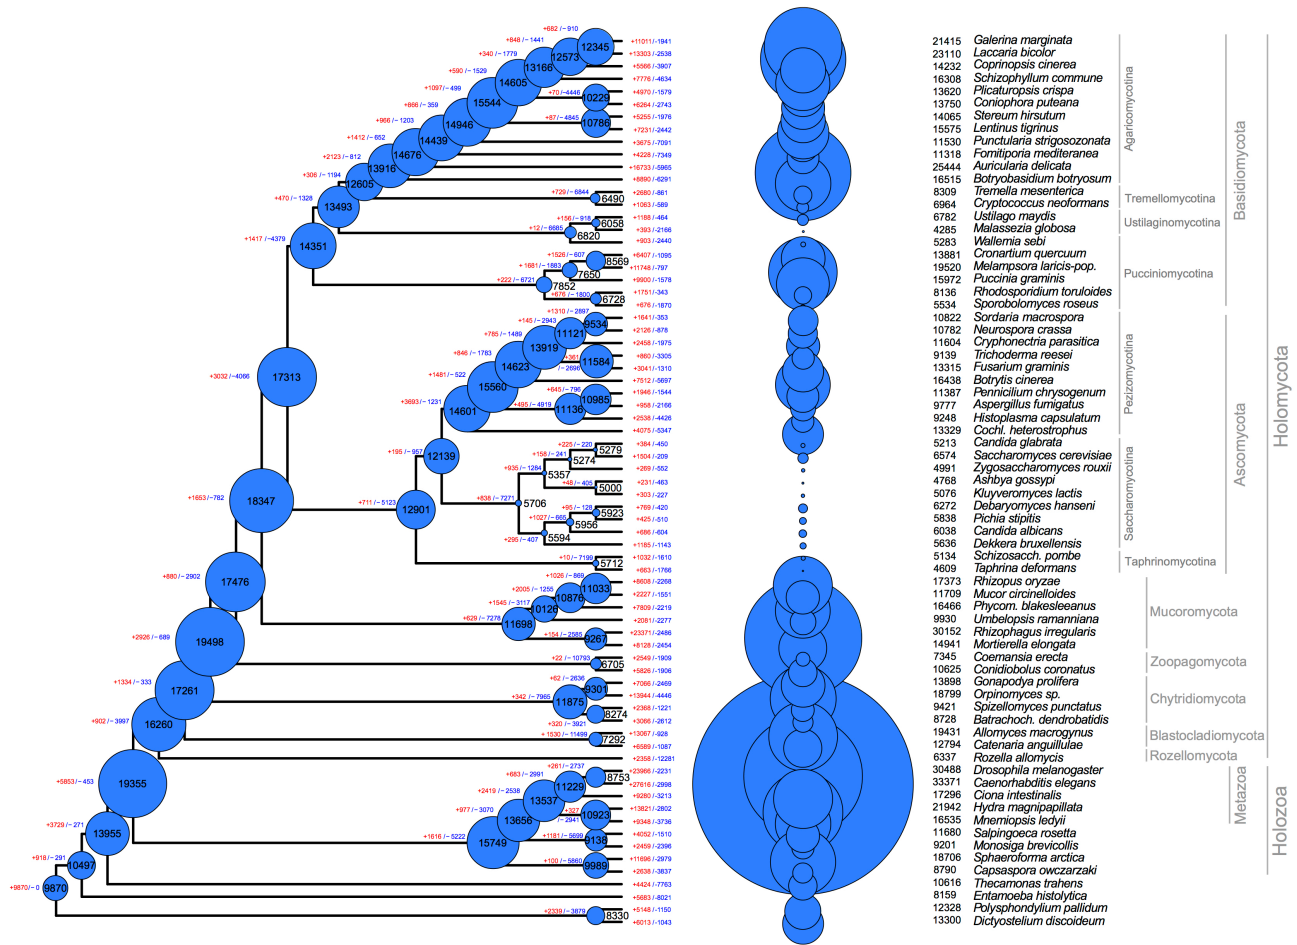

Supplementary Figure 2. Reconstructed ancestral genome sizes and gene duplication/loss histories across the examined genomes. Red and blue numbers represent gene duplications and losses across the tree. Numbers at right side represent extant gene copy numbers per species.

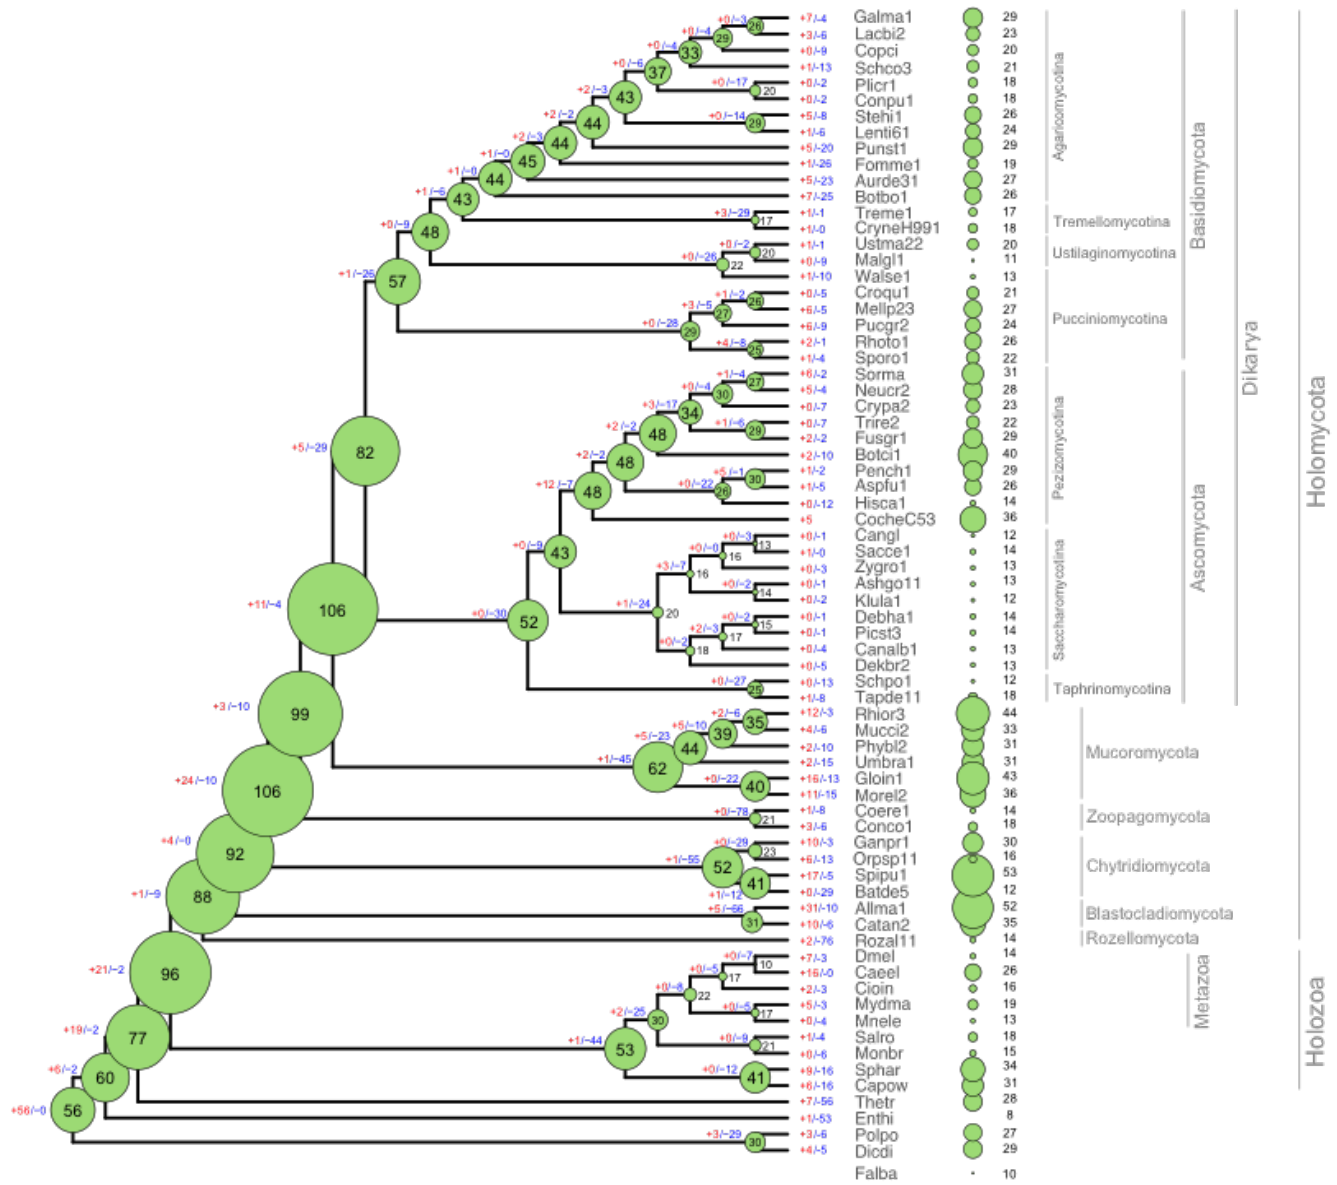

Supplementary Figure 3. Reconstructions of ancestral gene copy numbers of histidine-kinase genes. Numbers at the branches represent gene duplications (+) and losses (-) inferred by COMPARE. Bubble size is proportional to reconstructed ancestral gene copy number. Copy number distribution for each species is shown right to the tree.

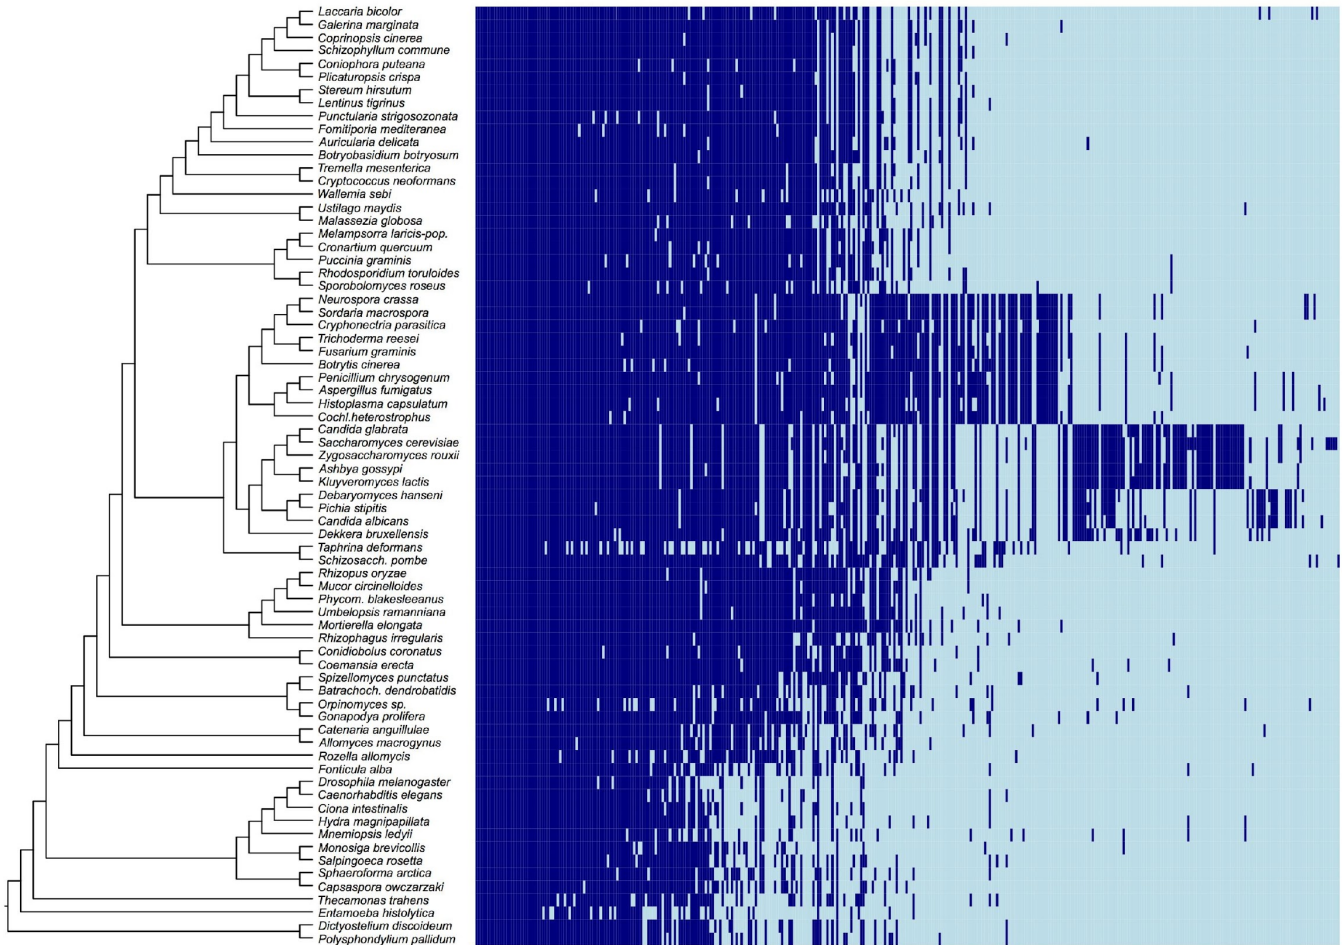

3.0

Supplementary Fig. 4. The conservation of hypha morphogenesis genes across fungi. Dark and light blue indicates that the given gene family is present and absent in a species' genome, respectively.

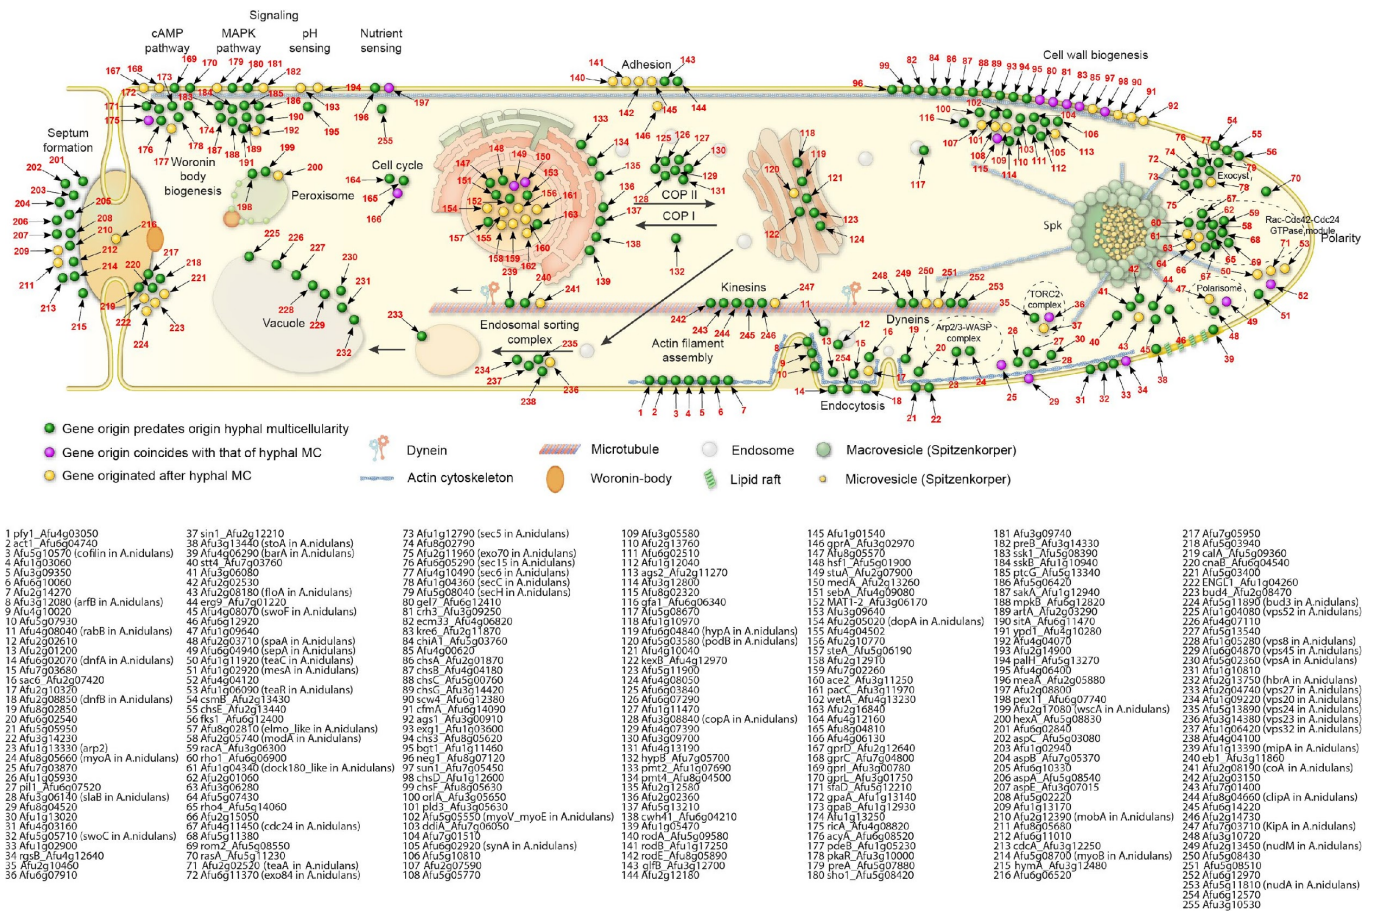

Supplementary Figure 5. Phylogenetic age distribution of hypha morphogenesis genes. Figure mirrors main text Figure 3 with gene names provided for each dot.

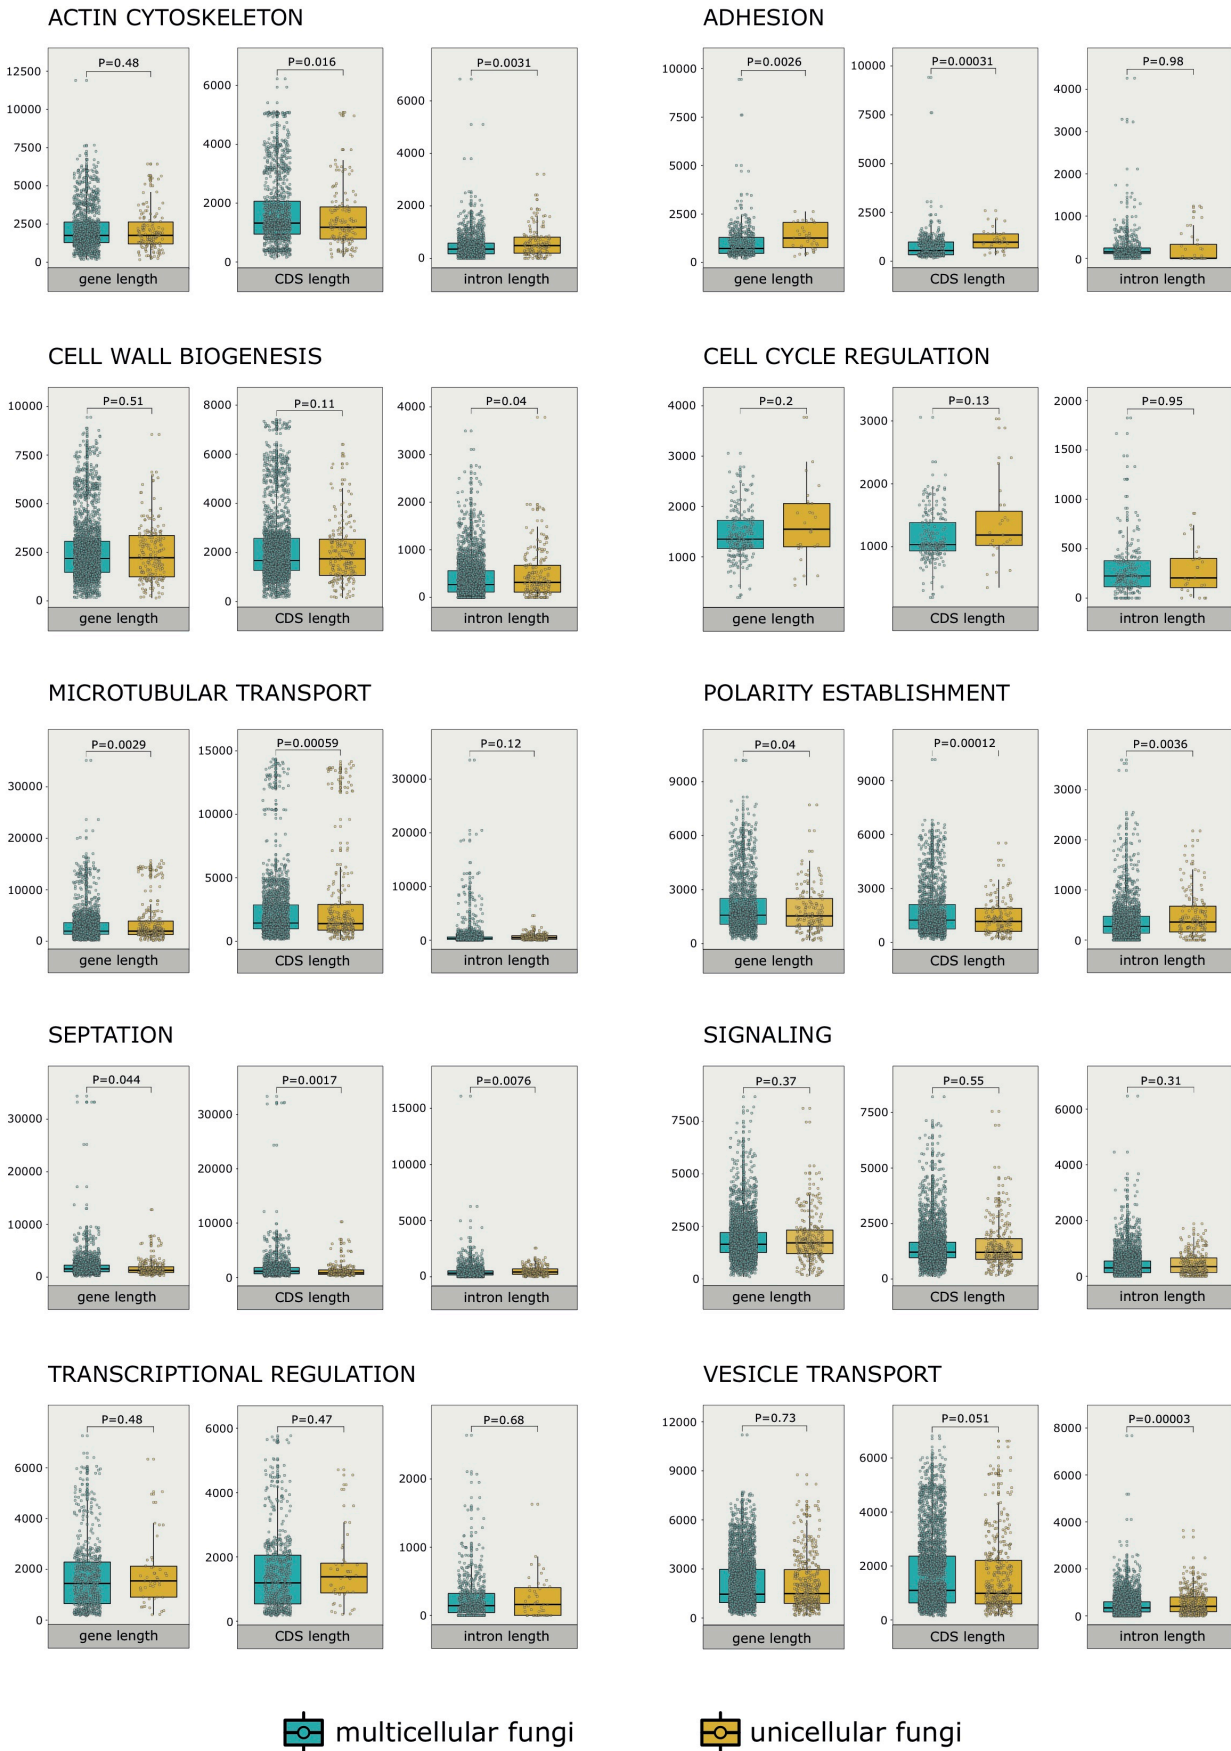

Supplementary Figure 6. Statistical comparisons of basic structural properties of genes related to hyphal MC. Box plots display differences in gene („gene length”), coding sequence („CDS



length”) and intron lengths of 4 unicellular (yellow) and 39 multicellular fungi (blue) in nine functional categories. P-values derived from independent two-tailed Welch’s t-tests are given for each comparison. Vertical lines on boxplots represent lower and upper quartiles.

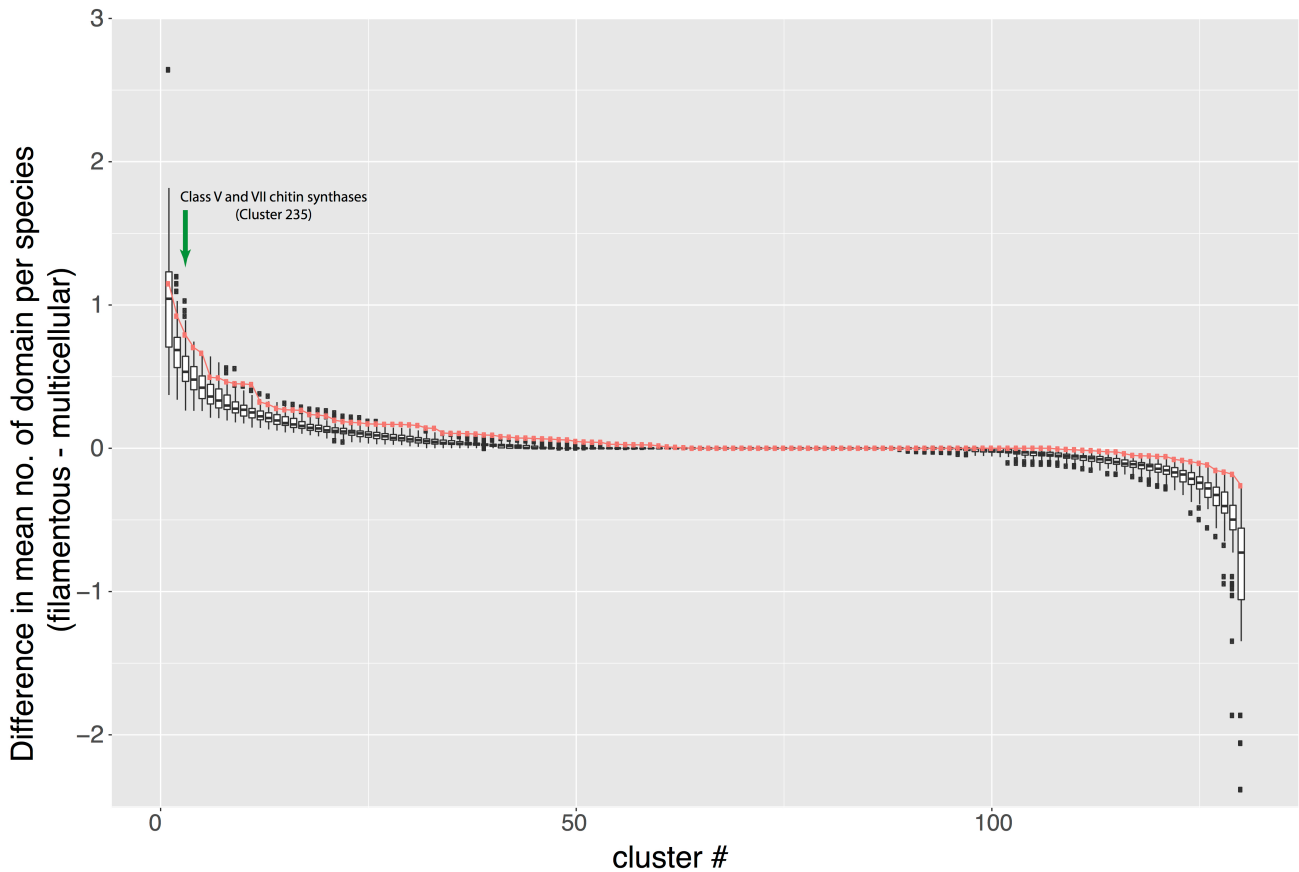

Supplementary Figure 7. Comparison of the dynamics of PFAM domain evolution between plesiomorphically unicellular and multicellular fungi. The plot shows for each of the morphogenesis-related gene families the difference between the mean number of domains per protein in unicellular and filamentous fungi (red dots). Boxplots (and corresponding outlier black dots) indicate the distribution of the same values across 100 randomly chosen clusters from the 72 genomes. Positive values indicate clusters in which proteins of multicellular fungi have, on average, more pfam domains, than unicellular fungi. Only clusters in which  $\geq 70\%$  of both unicellular and multicellular fungi are represented were considered in this analysis (129 out of 362 hypha morphogenesis-related clusters). Vertical lines on boxplots represent lower and upper quartiles.

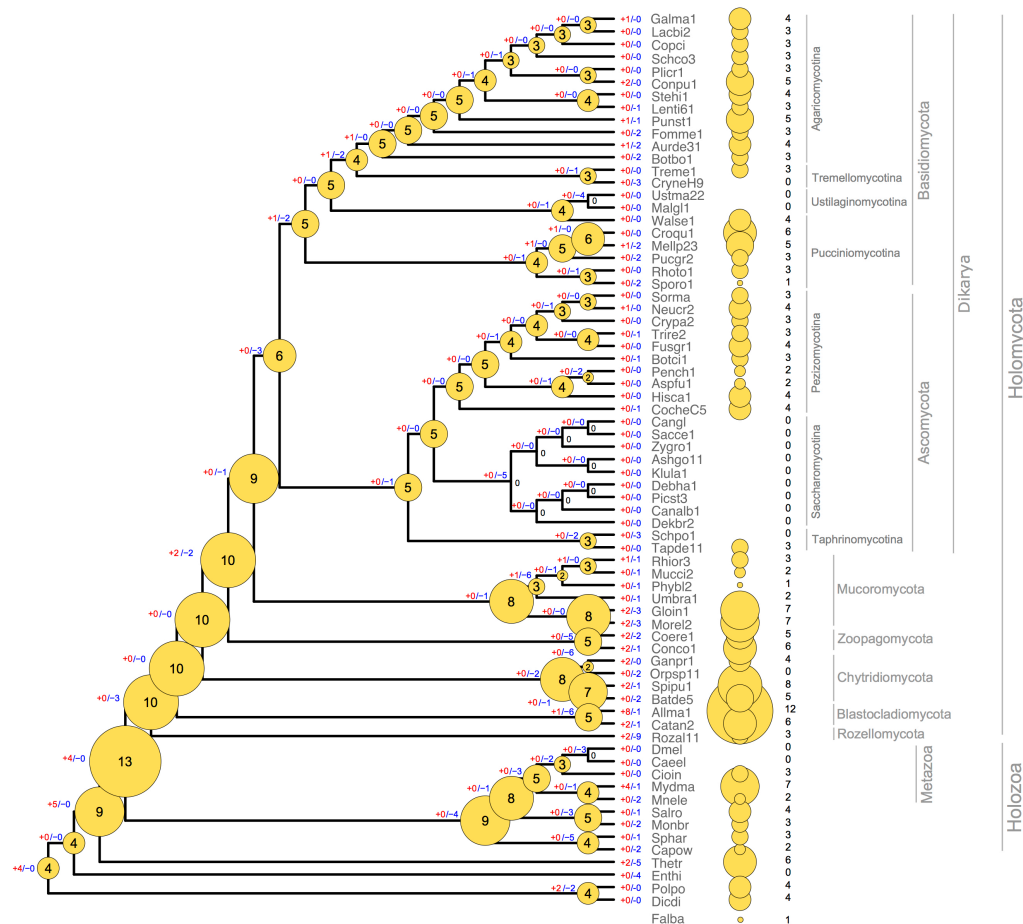

Supplementary Fig. 8. Reconstructions of ancestral gene copy numbers of NADPH-oxidase genes. Numbers at the branches represent gene duplications (+) and losses (-) inferred by COMPARE. Bubble size is proportional to reconstructed ancestral gene copy number. Copy number distribution for each species is shown right to the tree.

### Supplementary references

1. Brown, M. W., Spiegel, F. W. & Silberman, J. D. Phylogeny of the Cellular Slime Mold, *Fonticula alba*, Reveals a Key Evolutionary Branch within Opisthokonta. *Mol. Biol. Evol.* **26**, 2699–2709 (2009).
2. Brown, M. W., Kolisko, M., Silberman, J. D. & Roger, A. J. Aggregative Multicellularity Evolved Independently in the Eukaryotic Supergroup Rhizaria. *Curr. Biol.* **22**, 1123–1127 (2012).
3. Paps, J. & Ruiz-Trillo, I. Animals and Their Unicellular Ancestors. in *Encyclopedia of Life Sciences* (John Wiley & Sons, Ltd, 2010). doi:10.1002/9780470015902.a0022853
4. Paps, J., Medina-Chacón, L. A., Marshall, W., Suga, H. & Ruiz-Trillo, I. Molecular Phylogeny of Unikonts: New Insights into the Position of Apusomonads and Ancyromonads and the Internal Relationships of Opisthokonts. *Protist* **164**, 2–12 (2013).
5. Torruella, G. *et al.* Phylogenomics Reveals Convergent Evolution of Lifestyles in Close Relatives of Animals and Fungi. *Curr. Biol.* **25**, 2404–2410 (2015).
