# Supplementary material for: Comparative genomics reveals the origin of fungal hyphae and multicellularity
Source: PubMed Central journal article supplement (PMC6733946; doi:10.1038/s41467-019-12085-w), 2019-09-09
Supplement: 41467_2019_12085_MOESM4_ESM.pdf [file 41467_2019_12085_MOESM4_ESM.pdf]

## **Description of Additional Supplementary Files**

File Name: Supplementary Data 1

Description: List of 72 genomes/species used in the analyses

File Name: Supplementary Data 2

Description: Copy-numbers of hyphae morphogenesis gene families across 72 species

File Name: Supplementary Data 3

Description: 651 hypha morphogenesis-related genes

File Name: Supplementary Data 4

Description: Gene families whose origins mapped to BCZ nodes

File Name: Supplementary Data 5

Description: Results of the Fisher's exact test comparing the number of duplications mapped to BCZ nodes in each cluster to the genome-wide number of duplications

File Name: Supplementary Data 6

Description: Welch's t-test of basic genomic features of unicellular and multicellular fungi

File Name: Supplementary Data 7

Description: Domain architecture changes in unicellular and filamentous fungi

File Name: Supplementary Data 8

Description: List of 414 gene families identified by ANOVA

File Name: Supplementary Data 9

Description: Fisher's exact test of gene loss and gene retainment in yeast-like fungal clades

File Name: Supplementary Data 10

Description: Mcl clustering of 72 genomes

File Name: Supplementary Data 11

Description: Concatenated alignment of 72 species used for species tree inference

File Name: Supplementary Data 12

Description: RAXML species tree for 72 species

File Name: Supplementary Data 13

Description: IQTree species tree for 72 species

File Name: Supplementary Data 14

Description: PhyloBayes species tree for 72 species

File Name: Supplementary Data 15

Description: Gene trees for 362 hyphae morphogenesis gene clusters

File Name: Supplementary Data 16

Description: Gene trees for 414 newly predicted gene clusters

File Name: Supplementary Data 17

Description: Custom perl and R scripts for counting duplication rates
